# Supplementary material for: [(PPh3)Ag(CB11H6Y6)] (Y = H, Br): highly active, selective and recyclable Lewis acids for a hetero-Diels-Alder reaction.
Source: Royal Society of Chemistry journal article supplement (doi:10.1039/b106719b), 2001-10-17
Supplement: b106719b.doc [file b106719b.doc]

**Figure S1:** Extended solid state structure apparent in complex **(1)**: showing weak axial Ag···Br interactions, Ag(1)-Br(11)’ 3.4901(5) Å, Br(11)’-Ag(1)-Br(12) 157.15(1)

**Fig. S2.** Bar chart showing isolated yield of product **(III)** on three successive catalyst runs using the supported catalysts **(3)** to **(5).** *No added water*. [0.552 mmol of imine **(I)**, 0.829 mmol diene **(II)**, 10 mol% catalyst]. **(3)** = (supported-PPh3)Ag(CB11H12); **(4)** = (supported-PPh3)Ag(CB11H6Br6); **(5)** = (supported-PPh3)Ag(OTf)

**Fig. S3.** Bar chart showing isolated yield of product **(III)** on three successive catalyst runs using the supported catalysts **(3)** to **(5).** *Added water*. [0.552 mmol of imine **(I)**, 1 l H2O, 0.829 mmol diene **(II)**, 10 mol% catalyst]. Catalyst numbering as in figure S2.
